# Supplementary material for: Heterodinuclear (Sm, Tb) lanthanide pivalates with heterocyclic N-donors: synthesis, structure, thermal behavior, and magnetic and photoluminescence properties
Source: Royal Society of Chemistry journal article supplement (doi:10.1039/c4dt02590c), 2014-01-01
Supplement: c4dt02590c1.pdf [file c4dt02590c1.pdf]

## Heterodinuclear (Sm, Tb) lanthanide pivalates with heterocyclic N-donors: synthesis, structure, thermal behavior, magnetic and photoluminescence properties

Irina G. Fomina,\* Zhanna V. Dobrokhotova, Andrey B. Ilyukhin, Valery I. Zhilov, Artem S. Bogomyakov, Andrey A. Antoshkov, Yury S. Zavorotny, Vasilisa I. Gerasimova, Vladimir M. Novotortsev, and Igor L. Eremenko

*N.S. Kurnakov Institute of General and Inorganic Chemistry, Russian Academy of Sciences, Leninsky Prosp. 31, 119991 Moscow, GSP-1, Russian Federation. E-mail: fomina@igic.ras.ru*

**Fig. S1+** Synthetic details and analytical data for complex [SmTb(piv)<sub>6</sub>(bath)<sub>2</sub>] $\cdot$ EtOH (**2b** $\cdot$ EtOH).

**Synthesis of [SmTb(piv)<sub>6</sub>(bath)<sub>2</sub>] $\cdot$ EtOH (**2b** $\cdot$ EtOH).** Single crystals of **2b** $\cdot$ 2EtOH (30 mg) were kept over anhydrous CaCl<sub>2</sub> at 20 °C for 2 h. The single crystals that were obtained after the desolvation retained the habit and color, remained transparent, and were suitable for X-ray diffraction. The single phase of **2b** $\cdot$ 2EtOH was confirmed by X-ray powder diffraction. The yield of **2b** $\cdot$ EtOH was quantitative. The evaluated stoichiometry of Sm and Tb atoms in the crystal of **2b** $\cdot$ EtOH is 1.02 $\pm$ 0.05 : 1.03 $\pm$ 0.05. Found (%): C, 59.23; H, 6.01; N, 3.54. C<sub>80</sub>H<sub>92</sub>Sm<sub>1.0</sub>N<sub>4</sub>O<sub>13</sub>Tb<sub>1.0</sub>. Calculated (%): C, 59.06; H, 5.70; N, 3.45. FT-IR (KBr),  $\nu$ /cm<sup>-1</sup>: 3426 m, 3082 w, 3064 m, 3032 w, 2960 s, 2924 m, 2904 m, 2864 m, 1624 s, 1594 s, 1580 m, 1564 s, 1532 s, 1522 s, 1484 s, 1458 m, 1445 m, 1424 s, 1390 m, 1376 s, 1360 s, 1286 m, 1228 s, 1160 w, 1110 w, 1092 m, 1074 w, 1028 w, 1020 w, 1002 w, 986 w, 976 w, 938 w, 894 m, 878 w, 866 w, 856 m, 834 m, 806 m, 796 m, 790 m, 764 m, 744 m, 704 s, 664 w, 628 m, 606 m, 598 s, 574 m, 564 m, 550 m, 496w, 488 w, 475 w, 434 w.

**Table S1<sup>†</sup>.** Crystallographic parameters and structure refinement statistics for compounds **1**, **2a**·1.75EtOH, **2b**·2EtOH, and **2b**·EtOH.

| Identification code                | <b>1</b>                                                            | <b>2a</b> ·1.75EtOH                                                         | <b>2b</b> ·2EtOH                                                    | <b>2b</b> ·EtOH                                                     |
|------------------------------------|---------------------------------------------------------------------|-----------------------------------------------------------------------------|---------------------------------------------------------------------|---------------------------------------------------------------------|
| Empirical formula                  | C <sub>54</sub> H <sub>70</sub> N <sub>4</sub> O <sub>12</sub> SmTb | C <sub>81.50</sub> H <sub>96.5</sub> N <sub>4</sub> O <sub>13.75</sub> SmTb | C <sub>82</sub> H <sub>98</sub> N <sub>4</sub> O <sub>14</sub> SmTb | C <sub>80</sub> H <sub>92</sub> N <sub>4</sub> O <sub>13</sub> SmTb |
| Formula weight                     | 1276.41                                                             | 1661.39                                                                     | 1672.91                                                             | 1626.85                                                             |
| Temperature, K                     | 150(2)                                                              | 120(2)                                                                      | 173(2)                                                              | 296(2)                                                              |
| Wavelength, Å                      | 0.71073                                                             | 0.71073                                                                     | 0.71073                                                             | 0.71073                                                             |
| Crystal system                     | Triclinic                                                           | Triclinic                                                                   | Monoclinic                                                          | Monoclinic                                                          |
| Space group                        | –                                                                   | –                                                                           | C2/c                                                                | C2/c                                                                |
| a, Å                               | 10.288(2)                                                           | 12.2129(10)                                                                 | 30.978(6)                                                           | 31.2102(8)                                                          |
| b, Å                               | 11.9691(12)                                                         | 14.3749(12)                                                                 | 14.701(3)                                                           | 14.7436(4)                                                          |
| c, Å                               | 12.7440(13)                                                         | 23.947(2)                                                                   | 18.594(3)                                                           | 18.7990(5)                                                          |
| α, deg                             | 113.092(2)                                                          | 100.5730(10)                                                                | 90                                                                  | 90                                                                  |
| β, deg                             | 99.678(3)                                                           | 90.8990(10)                                                                 | 106.894(4)                                                          | 107.2480(10)                                                        |
| γ, deg                             | 96.877(3)                                                           | 97.9340(10)                                                                 | 90                                                                  | 90                                                                  |
| Volume, Å <sup>3</sup>             | 1392.8(3)                                                           | 4089.5(6)                                                                   | 8102(3)                                                             | 8261.4(4)                                                           |
| Z                                  | 1                                                                   | 2                                                                           | 4                                                                   | 4                                                                   |
| Density (calc), mg/m <sup>3</sup>  | 1.522                                                               | 1.349                                                                       | 1.371                                                               | 1.308                                                               |
| Abs. coefficient, mm <sup>-1</sup> | 2.364                                                               | 1.63                                                                        | 1.646                                                               | 1.611                                                               |
| F(000)                             | 645                                                                 | 1701                                                                        | 3428                                                                | 3324                                                                |
| Crystal size, mm <sup>3</sup>      | 0.32 x 0.12 x 0.03                                                  | 0.24 x 0.08 x 0.05                                                          | 0.13 x 0.09 x 0.07                                                  | 0.35 x 0.3 x 0.28                                                   |
| Theta range                        | 2.827 to 26.258°                                                    | 2.314 to 27.562°                                                            | 2.592 to 25.995°                                                    | 2.57 to 28.32°                                                      |
| Index ranges                       | -12<=h<=12<br>-14<=k<=14<br>-15<=l<=15                              | -15<=h<=15<br>-18<=k<=18<br>-30<=l<=31                                      | -38<=h<=38<br>-17<=k<=18<br>-22<=l<=19                              | -41<=h<=41<br>-19<=k<=19<br>-24<=l<=25                              |
| Reflections collected              | 10023                                                               | 40985                                                                       | 26072                                                               | 51828                                                               |
| Independent reflections, R(int)    | 5390, 0.0564                                                        | 18812, 0.035                                                                | 7947, 0.1031                                                        | 10193, 0.0409                                                       |
| Completeness                       | 97.7 %                                                              | 99.9 %                                                                      | 99.9 %                                                              | 99.2 %                                                              |
| Absorption correction              | Semi-empirical from equivalents                                     | Semi-empirical from equivalents                                             | Semi-empirical from equivalents                                     | Semi-empirical from equivalents                                     |
| Max. and min. transmission         | 0.745 and 0.571                                                     | 0.7456 and 0.5906                                                           | 0.7456 and 0.5688                                                   | 0.6471 and 0.5166                                                   |
| Refinement method                  | Full-matrix least-squares on F <sup>2</sup>                         | Full-matrix least-squares on F <sup>2</sup>                                 | Full-matrix least-squares on F <sup>2</sup>                         | Full-matrix least-squares on F <sup>2</sup>                         |
| Data/ restraints/ parameters       | 5390 / 122 / 379                                                    | 18812 / 420 / 1081                                                          | 7947 / 54 / 494                                                     | 10193 / 2 / 436                                                     |

|                                                   |                  |                  |                  |                  |
|---------------------------------------------------|------------------|------------------|------------------|------------------|
| Goodness-of-fit on $F^2$                          | 1.00             | 1.015            | 1.127            | 0.976            |
| R1, wR2 [ $I > 2\sigma(I)$ ]                      | 0.0502, 0.1014   | 0.0401, 0.0931   | 0.0729, 0.1826   | 0.0368, 0.1126   |
| R1, wR2 (all data)                                | 0.08, 0.1129     | 0.0708, 0.1089   | 0.1221, 0.2058   | 0.0589, 0.1382   |
| Largest diff. peak and hole, e. $\text{\AA}^{-3}$ | 1.028 and -1.522 | 1.319 and -0.621 | 1.920 and -2.123 | 1.462 and -0.615 |

---

**Table S2<sup>+</sup>.** Mass spectra of complexes [SmTb(piv)<sub>6</sub>(phen)<sub>2</sub>] (**1**) and [SmTb(piv)<sub>6</sub>(bath)<sub>2</sub>]·1.75EtOH (**2a**·1.75EtOH).

| Ion                                                                    | <b>1</b>                | <b>2a</b> ·1.75EtOH     |
|------------------------------------------------------------------------|-------------------------|-------------------------|
|                                                                        | <i>I</i> <sub>rel</sub> | <i>I</i> <sub>rel</sub> |
| [SmTb(piv) <sub>2</sub> ] <sup>+</sup>                                 | 6·10 <sup>-2</sup>      | 9·10 <sup>-2</sup>      |
| [SmTb(piv) <sub>2</sub> OH] <sup>+</sup>                               | 7·10 <sup>-2</sup>      | 8·10 <sup>-2</sup>      |
| [Sm <sub>2</sub> (piv) <sub>2</sub> OH] <sup>+</sup>                   | 1·10 <sup>-2</sup>      | <1·10 <sup>-2</sup>     |
| [Tb <sub>2</sub> (piv) <sub>2</sub> OH] <sup>+</sup>                   | <1·10 <sup>-2</sup>     | <1·10 <sup>-2</sup>     |
| [SmTb(piv) <sub>3</sub> O] <sup>+</sup>                                | 0.12                    | 0.1                     |
| [SmTb(piv) <sub>3</sub> CO] <sup>+</sup>                               | 1.0                     | 0.6                     |
| [SmTb(piv) <sub>3</sub> O <sub>2</sub> H] <sup>+</sup>                 | 0.15                    | 0.16                    |
| [SmTb(piv) <sub>3</sub> CCO <sub>2</sub> H] <sup>+</sup>               | -                       | 0.24                    |
| [SmTb(piv) <sub>3</sub> CCO <sub>2</sub> ] <sup>+</sup>                | 0.11                    | -                       |
| [Sm <sub>2</sub> (piv) <sub>4</sub> ] <sup>+</sup>                     | 0.1                     | -                       |
| [SmTb(piv) <sub>4</sub> ] <sup>+</sup>                                 | 0.43                    | 0.58                    |
| [SmTb(piv) <sub>4</sub> O <sub>2</sub> H] <sup>+</sup>                 | 0.2                     | 0.1                     |
| [SmTb(piv) <sub>5</sub> -CH <sub>3</sub> ] <sup>+</sup>                | 6·10 <sup>-2</sup>      | 5·10 <sup>-3</sup>      |
| [SmTb(piv) <sub>5</sub> ] <sup>+</sup>                                 | 0.75                    | 1.0                     |
| [Tb <sub>2</sub> (piv) <sub>5</sub> ] <sup>+</sup>                     | 0.25                    | 0.15                    |
| [SmTb(piv) <sub>5</sub> O <sub>2</sub> H] <sup>+</sup>                 | <1·10 <sup>-2</sup>     | <1·10 <sup>-2</sup>     |
| [Sm <sub>2</sub> (piv) <sub>6</sub> -3(CH <sub>3</sub> )] <sup>+</sup> | <1·10 <sup>-2</sup>     | -                       |
| [Sm <sub>2</sub> Tb <sub>2</sub> (piv) <sub>2</sub> CCO] <sup>+</sup>  | 6·10 <sup>-2</sup>      | 4·10 <sup>-2</sup>      |
| [Sm <sub>4</sub> (piv) <sub>3</sub> -CH <sub>3</sub> ] <sup>+</sup>    | <1·10 <sup>-2</sup>     | -                       |

**Table S3<sup>†</sup>.** Selected bond lengths and Ln...Ln distances (Å) in compounds [(SmTb(piv)<sub>6</sub>(phen)<sub>2</sub>] (**1**), [SmTb(piv)<sub>6</sub>(bath)<sub>2</sub>]·1.75EtOH (**2a**·1.75EtOH), [SmTb(piv)<sub>6</sub>(bath)<sub>2</sub>]·2EtOH (**2b**·2EtOH), and [SmTb(piv)<sub>6</sub>(bath)<sub>2</sub>]·EtOH (**2b**·EtOH)

| Identification | <b>1</b> | <b>2a</b> ·1.75EtOH | <b>2b</b> ·2EtOH | <b>2b</b> ·EtOH |
|----------------|----------|---------------------|------------------|-----------------|
| Ln...Ln1'      | 5.391(1) | 3.9909(4)           | 4.294(1)         | 4.2844(3)       |
| Ln1—O1         | 2.254(5) | 2.413(3)            | 2.411(6)         | 2.395(2)        |
| Ln1—O2         | 2.342(5) | 2.766(3)            | 2.284(6)         | 2.295(2)        |
| Ln1—O3         | 2.403(5) | 2.352(3)            | 2.402(7)         | 2.391(2)        |
| Ln1—O4         | 2.385(5) |                     | 2.265(6)         | 2.282(2)        |
| Ln1—O5         | 2.420(5) | 2.379(3)            | 2.436(7)         | 2.435(2)        |
| Ln1—O6         | 2.411(5) |                     | 2.462(7)         | 2.461(2)        |
| Ln1—O7         |          | 2.360(3)            |                  |                 |
| Ln1—O9         |          | 2.444(3)            |                  |                 |
| Ln1—O10        |          | 2.469(3)            |                  |                 |
| Ln1—N1         | 2.550(6) | 2.647(3)            | 2.716(7)         | 2.702(3)        |
| Ln1—N1'        | 5.391(1) | 2.615(3)            | 2.591(8)         | 2.597(3)        |
| Ln2—O2         |          | 2.339(3)            |                  |                 |
| Ln2—O4         |          | 2.364(3)            |                  |                 |
| Ln2—O6         |          | 2.384(3)            |                  |                 |
| Ln2—O7         |          | 2.782(3)            |                  |                 |
| Ln2—O8         |          | 2.400(3)            |                  |                 |
| Ln2—O11        |          | 2.566(3)            |                  |                 |
| Ln2—O12        |          | 2.408(3)            |                  |                 |
| Ln2—N3         |          | 2.611(3)            |                  |                 |
| Ln2—N4         |          | 2.643(3)            |                  |                 |

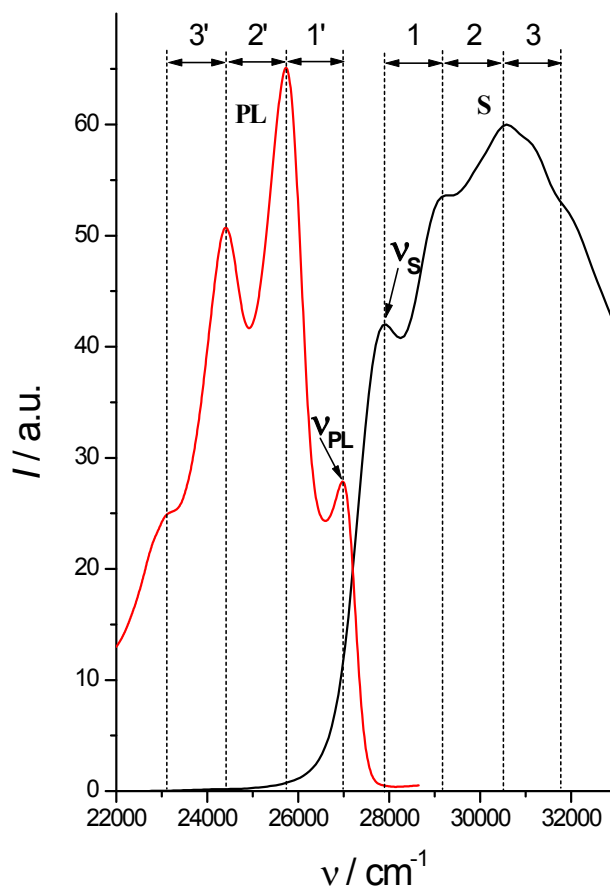

**Figure S2**+ PL spectra (black,  $\lambda_{ex} = 337$  nm, 77 K) and scattering (red, 300 K) spectra of gadolinium complex 7.

Because of the complexity of the molecules from the point of view of a set of oscillators, the use of the scattering spectrum instead of the absorption spectrum, and the fact that the PL and scattering spectra were measured at different temperatures, the mirror symmetry of the curves is not visible in Figure S3. As can be seen from Figure S2, the frequency ranges 1, 2, and 3 in the scattering spectrum coincide with the corresponding ranges 1', 2', and 3' in the PL spectrum. The corresponding peaks reflect the vibrational structure, which has a mirror symmetry with respect to the vertical line that passes through  $\nu_0 = (\nu_{PL} + \nu_S)/2$  and determines, according to the symmetry conditions for frequencies [Levshin, V. L. *Photoluminescence of Liquids and Solids*, Gos. Izd. Tekhniko-teoreticheskoi literatury, Moscow, Leningrad, 1951, p. 104 (in Russian)], the position of the  $S_1$  energy level of the bath ligand.

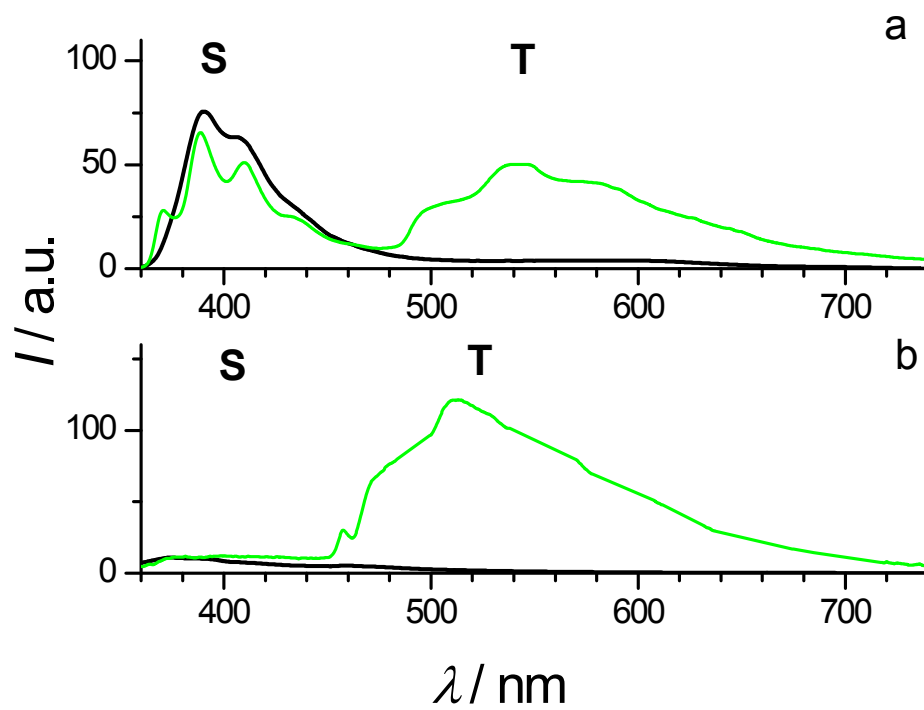

**Figure S3+** PL spectra of the gadolinium complexes ( $\lambda_{ex} = 337 \text{ nm}$ ; black, 300 K; green, 77 K): (a) 7, (b) 8.
